# Supplementary material for: In Silico Screening of Bioactive Compounds of Representative Seaweeds to Inhibit SARS-CoV-2 ACE2-Bound Omicron B.1.1.529 Spike Protein Trimer
Source: MDPI journal article supplement (doi:10.3390/md20020148), 2022-02-17
Supplement: s1 [file s1]

## Supplementary File

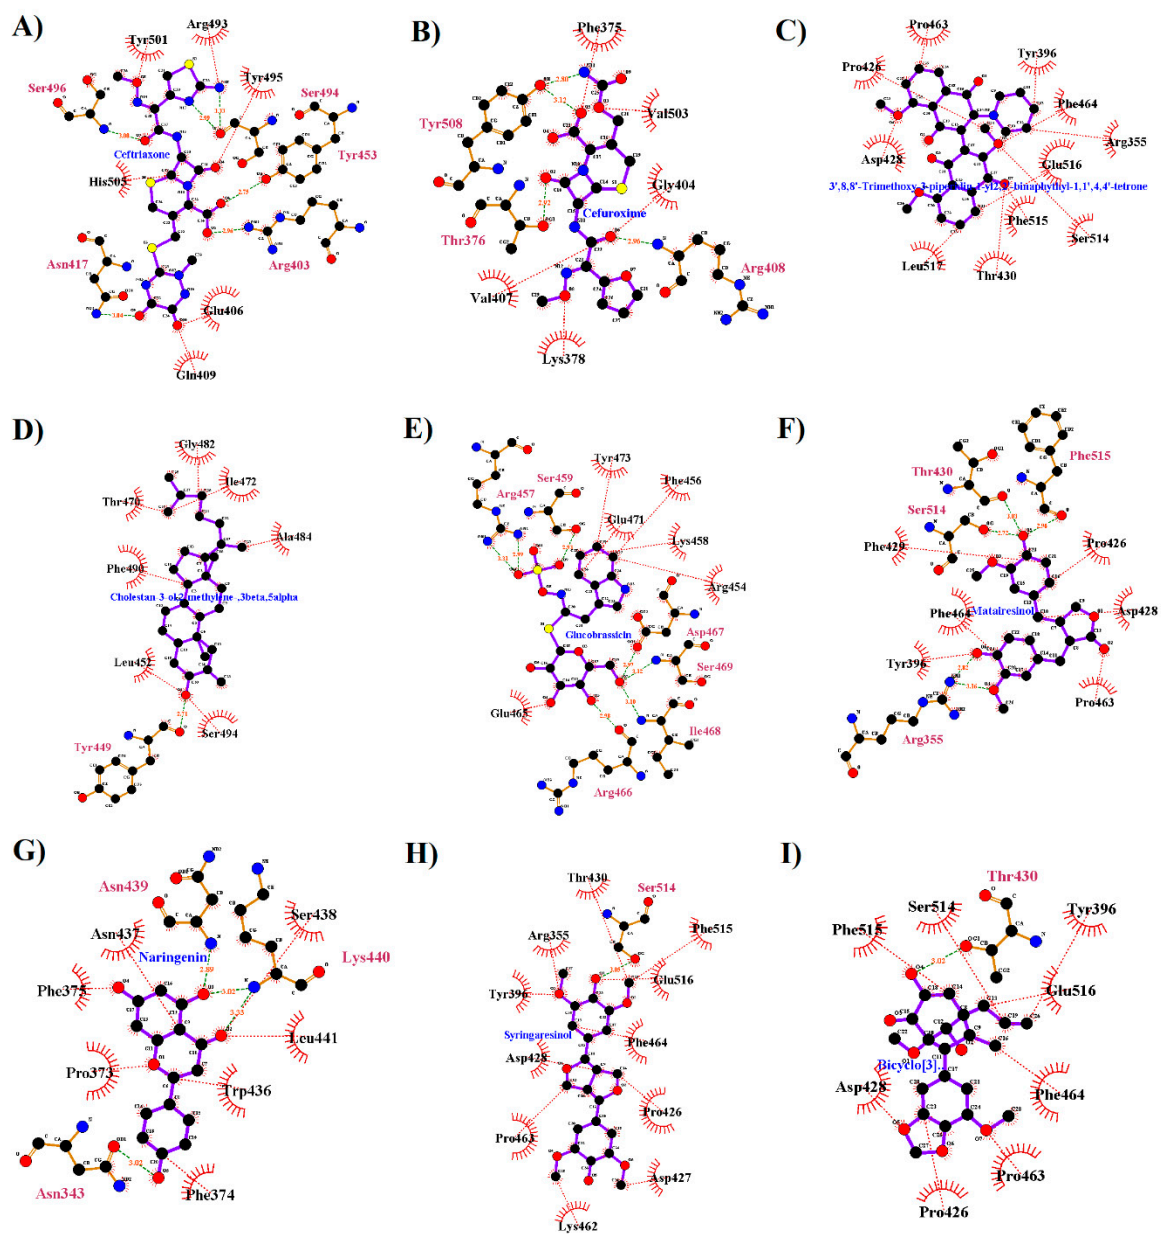

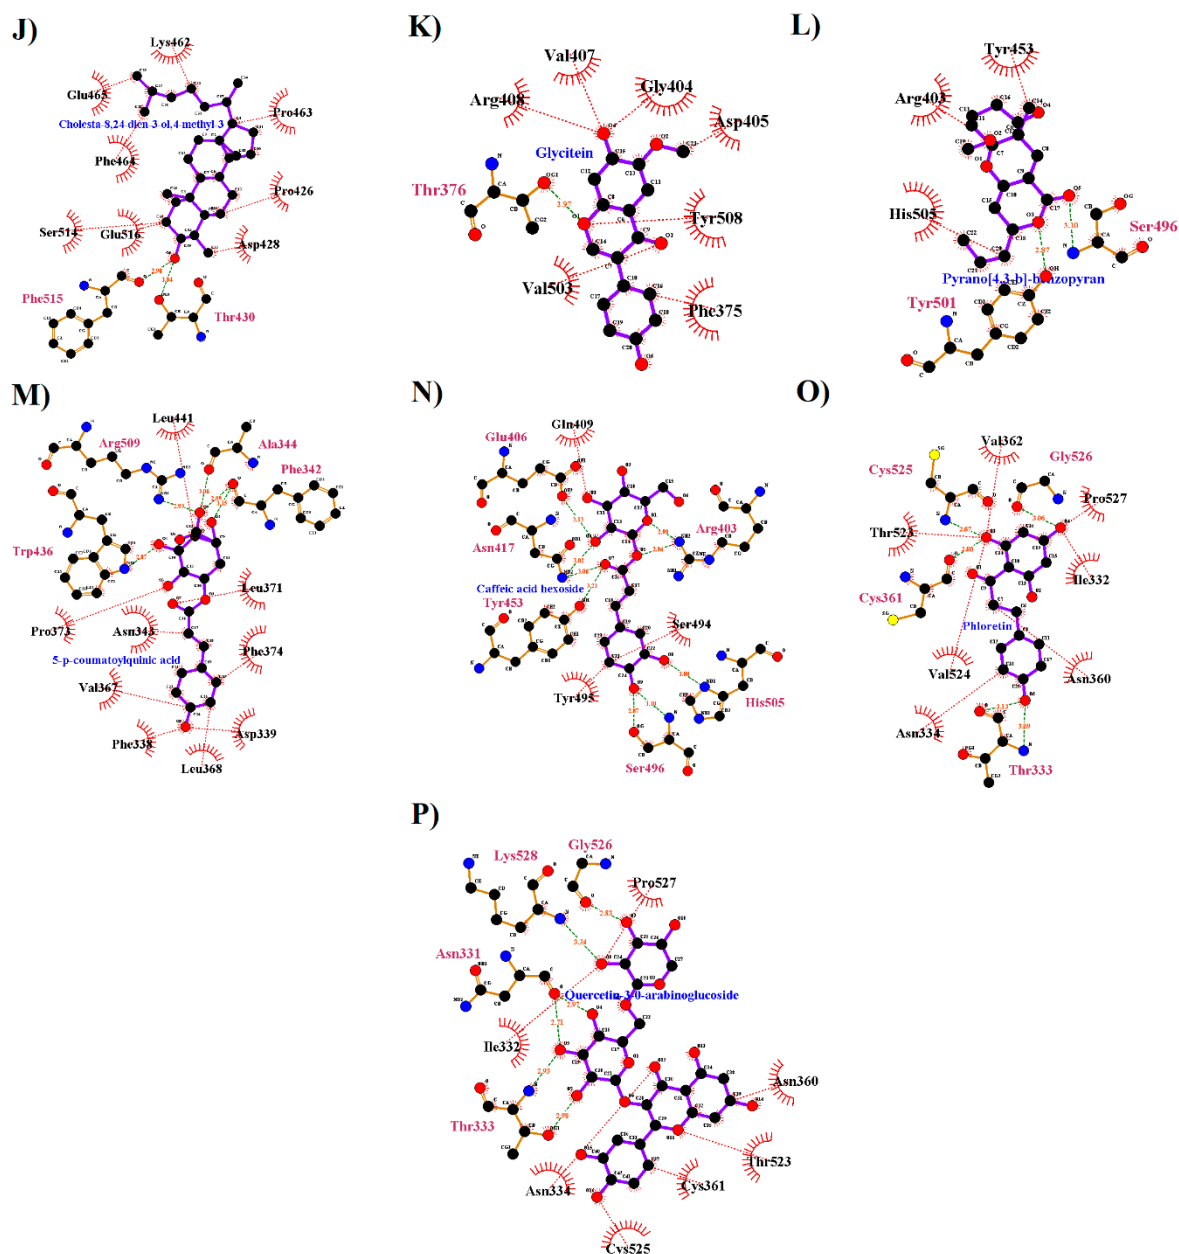

**Figure S1:** The Ligplot interaction between the analyzed compounds and the RBD of omicron B.1.1.529 spike protein with the binding affinity of  $\leq -6.0$  kcal/mol. A) Ceftriaxone-RBD, B) Cefuroxime, C) 3',8,8'-Trimethoxy-3-piperidin-1-yl-2,2'-binaphthyl-1,1',4,4'-tetrone, D) Cholestan-3-ol, 2-methylene-, (3beta, 5 alpha), E) Glucobrassicin, F) Matairesinol, G) Naringenin, H) Syringaresinol, I) Bicyclo[3.2.1]oct-3-en-2-one, 3,8-dihydroxy-1-methoxy-7-(7-methoxy-1,3-benzodioxol-5-yl)-6-methyl-5, J) Cholesta-8,24-dien-3-ol, 4-methyl-, (3beta,4.alpha.)-, K) Glycitein, L) Pyrano [4,3-b] benzopyran-1,9-dione, 5a-methoxy-9a-methyl-3-(1-propenyl)perhydro-, M) 5-p-coumaroylquinic acid, N) Caffeic acid hexoside, O) Phloretin, P) Quercetin-3-O-arabinoglucoside.

**Table S1:** The list of seaweeds and compounds utilized in the current study

| S. No.                           | Seaweeds and Phytocompounds                                          | Binding affinity (kcal/mol) | RMSD (Å) |
|----------------------------------|----------------------------------------------------------------------|-----------------------------|----------|
| <i>Ulva fasciata</i> [1]         |                                                                      |                             |          |
| 1.                               | Azelaic acid                                                         | -4.5                        | 2.063    |
| 2.                               |                                                                      | -4.5                        | 1.426    |
|                                  | n-Pentadecanoic acid                                                 |                             |          |
| 3.                               | Hexahydrofarnesyl acetone                                            | -5.0                        | 1.555    |
| 4.                               | Palmitic acid                                                        | -4.0                        | 3.37     |
| 5.                               | Palmitic acid ethyl ester                                            | -3.7                        | 1.81     |
| <i>Corallina officinalis</i> [2] |                                                                      |                             |          |
| 6.                               | n-Nonadecane                                                         | -4.4                        | 12.43    |
| 7.                               | Chloroacetic acid, octadecyl ester,                                  | -4.5                        | 1.803    |
| 8.                               | Cholestan-3-ol, 2-methylene-, (3beta, 5 alpha)                       | -6.0                        | 3.074    |
| 9.                               | 2-Methylhexadecan-1-ol                                               | -3.5                        | 1.88     |
| 10.                              | 1-Docosene                                                           | -4.3                        | 1.957    |
| 11.                              | 1,2,3- Propanetricarboxylic acid, 2-(acetyloxy)-,tributyl ester      | -4.5                        | 1.95     |
| 12.                              | 1,1-Dimethyltetradecyl hydrosulfide                                  | -3.7                        | 24.717   |
| 13.                              | 1-Eicosanol                                                          | -4.7                        | 3.579    |
| 14.                              | 1,54-Dibromotetra Pentacontane                                       | -1.0                        | 29.281   |
| 15.                              | 3',8,8'-Trimethoxy-3-piperidin-1-yl2,2'-binaphthyl-1,1',4,4'-tetrone | -6.9                        | 1.897    |
| 16.                              | (17E)-17-Pentatriacontene                                            | -1.0                        | 0.165    |
| 17.                              | 2-Octadecoxyethanol                                                  | -3.7                        | 5.639    |
| <i>Colpomenia sinuosa</i> [2]    |                                                                      |                             |          |
| 18.                              | n-Tetradecanoic acid                                                 | -4.3                        | 4.283    |
| 19.                              | Tetradecanoic acid, ethyl ester                                      | -4.3                        | 4.243    |
| 20.                              | 6,10,14-Trimethylpentadecan-2-one                                    | -4.3                        | 4.454    |
| 21.                              | n-Hexadecanoic acid                                                  | -4.3                        | 22.956   |
| 22.                              | n-Tridecanoic acid, ethyl ester                                      | -4.6                        | 1.701    |
| 23.                              | n-Pentadecanoic acid, ethyl ester                                    | -4.2                        | 1.93     |
| 24.                              | Ethyl (9Z,11E)-9,11-octadecadienoate                                 | -4.0                        | 19.205   |
| 25.                              | Ethyl n-heptadecanoate                                               | -3.7                        | 2.473    |
| 26.                              | Bis (2-ethylhexyl) 1,2-benzenedicarboxylate                          | -5.2                        | 1.976    |
| 27.                              | Ethyl n-hexadecanoate                                                | -3.9                        | 4.736    |
| <i>Sargassum wightii</i> [3]     |                                                                      |                             |          |
| 28.                              | Phloretin                                                            | -6.3                        | 0.061    |
| 29.                              | Heptadecanoic acid                                                   | -4.1                        | 1.658    |
| 30.                              | Oleic acid                                                           | -4.4                        | 1.747    |
| 31.                              | 5-p-coumaroylquinic acid                                             | -6.0                        | 4.96     |
| 32.                              | Quercetin-3-O-arabinpyranoside                                       | -6.1                        | 2.248    |
| 33.                              | Caffeic acid hexoside                                                | -6.4                        | 2.82     |
| 34.                              | Squalene                                                             | -3.6                        | 19.813   |
| <i>Gracilaria corticate</i> [4]  |                                                                      |                             |          |

|                                      |                                                                                                     |      |        |
|--------------------------------------|-----------------------------------------------------------------------------------------------------|------|--------|
| 35.                                  | Oxirane, decyl-                                                                                     | -3.9 | 12.931 |
| 36.                                  | n-hexadecanoic acid                                                                                 | -4.4 | 1.478  |
| 37.                                  | Eicosanoic acid                                                                                     | -4.6 | 6.426  |
| 38.                                  | Nonanoic acid                                                                                       | -4.2 | 3.19   |
| 39.                                  | Oleic acid                                                                                          | -4.6 | 6.711  |
| 40.                                  | Pentadecanoic acid                                                                                  | -4.3 | 6.226  |
| 41.                                  | Bicyclo[3.2.1]oct-3-en-2-one, 3,8-dihydroxy-1-methoxy-7-(7-methoxy-1,3-benzodioxol-5-yl)-6-methyl-5 | -6.3 | 20.322 |
| 42.                                  | N-(5-chloro-2-hydroxyphenyl) dodecanamide                                                           | -5.3 | 1.674  |
| 43.                                  | Cholesta-8,24-dien-3-ol, 4-methyl-, (3.beta.,4.alpha.)-                                             | -6.8 | 1.544  |
| 44.                                  | Undecane, 2-methyl-                                                                                 | -3.4 | 1.411  |
| 45.                                  | Hexadecanal                                                                                         | -4.3 | 2.192  |
| 46.                                  | Triacontanoic acid, methyl ester                                                                    | -0.9 | 29.217 |
| <b><i>Caulerpa racemosa</i> [5]</b>  |                                                                                                     |      |        |
| 47.                                  | 6-Hydroxy-4, 4,7atrimethyl-5, 6, 7,7atetrahydro-1-benzofuran-2(4H)-one                              | -5.5 | 2.004  |
| 48.                                  | Hexadecanoic acid, methyl ester                                                                     | -4.2 | 5.929  |
| 49.                                  | n-Hexadecanoic acid                                                                                 | -3.9 | 39.871 |
| 50.                                  | Palmitic anhydride                                                                                  | -4.8 | 28.901 |
| 51.                                  | Rhodovibrin                                                                                         | -0.9 | 32.477 |
| 52.                                  | Phytol                                                                                              | -5.2 | 2.959  |
| 53.                                  | 9,12-Octadecadienoic acid (Z, Z)                                                                    | -4.6 | 1.291  |
| 54.                                  | Oleic acid                                                                                          | -4.9 | 1.907  |
| 55.                                  | Methyclothiazide                                                                                    | -5.1 | 2.546  |
| 56.                                  | Glycidyl palmitate                                                                                  | -4.1 | 1.531  |
| 57.                                  | 2-cis,cis-9,12-Octadecadienyloxy ethanol                                                            | -3.7 | 13.714 |
| 58.                                  | 1H-Indene, 1-hexadecyl-2,3-dihydro                                                                  | -5.5 | 3.585  |
| 59.                                  | Glycerol 1-palmitate                                                                                | -3.6 | 1.504  |
| 60.                                  | 1H-cyclopropal                                                                                      | -    | -      |
| 61.                                  | Diisooctyl phthalate                                                                                | -4.6 | 1.936  |
| 62.                                  | 17-Octadecynoic acid, TMS derivative                                                                | -    | -      |
| 63.                                  | Linoleic acid ethyl ester                                                                           | -3.7 | 3.064  |
| 64.                                  | Glucobrassicin                                                                                      | -6.8 | 1.521  |
| 65.                                  | Oleic acid, eicosyl ester                                                                           | -4.9 | 1.907  |
| 66.                                  | 5(α)Pregane3α,20αdiol                                                                               | -    | -      |
| 67.                                  | 6-Hydroxy-4, 4,7atrimethyl-5, 6, 7,7atetrahydro-1-benzofuran-2(4H)-one                              | -5.5 | 2.004  |
| <b><i>Padina boergesenii</i> [5]</b> |                                                                                                     |      |        |
| 68.                                  | Glycitein                                                                                           | -6.1 | 11.668 |
| 69.                                  | Matairesinol                                                                                        | -6.0 | 1.707  |
| 70.                                  | 9-Hexadecenoic acid, methyl ester (Z)                                                               | -    | -      |
| 71.                                  | Hexadecanoic acid, methyl ester                                                                     | -4.1 | 1.82   |
| 72.                                  | n-Hexadecanoic acid                                                                                 | -4.5 | 5.689  |
| 73.                                  | Pyrano [4,3-b] benzopyran-1,9-dione, 5amethoxy-9amethyl-3-(1-propenyl) perhydro                     | -6.1 | 29.617 |
| 74.                                  | Butanoic acid, 4-chloro                                                                             | -4.9 | 2.083  |

|                                     |                                                            |      |       |
|-------------------------------------|------------------------------------------------------------|------|-------|
| 75.                                 | Arachidonic acid                                           | -4.9 | 1.578 |
| 76.                                 | Naringenin                                                 |      |       |
| 77.                                 | 11,14-Octadecadienoic acid, methyl ester                   | -4.3 | 1.409 |
| 78.                                 | 9-Octadecenoic acid (Z)-, methyl ester                     | -3.9 | 4.343 |
| 79.                                 | Phytol                                                     | -4.1 | 2.174 |
| 80.                                 | 13-Heptadecyn-1-ol                                         | -4.4 | 1.775 |
| 81.                                 | cis-Vaccenic acid                                          | -4.0 | 1.437 |
| 82.                                 | 5,8,11,14 -Eicosatetraenoic acid, methyl ester, (all-Z)    | -    | -     |
| 83.                                 | 1H-Cyclopropa [3,4] benz [1,2-e] azulene4a,5,7b,9,9a (1aH) | -    | -     |
| 84.                                 | Stearic acid, 3-(octadecyloxy) propyl                      | -    | -     |
| 85.                                 | Glycidyl oleate                                            | -4.5 | 3.938 |
| 86.                                 | (1S)-1-Hexadecyl-2,3-dihydro-1Hindene                      | -5.1 | 4.57  |
| 87.                                 | 2-Oleoyleglycerol, 2TMS derivative                         | -    | -     |
| 88.                                 | Cyclohexane, 1,1-dodecylidenebis [4-methyl]                | -5.3 | 1.154 |
| 89.                                 | Glucobrassicin                                             | -6.8 | 1.521 |
| <b><i>Gracilaria edulis</i> [6]</b> |                                                            |      |       |
| 90.                                 | Eugenol                                                    | -4.5 | 1.213 |
| 91.                                 | Nonane                                                     | -3.8 | 1.844 |
| 92.                                 | Undecane                                                   | -4.1 | 1.277 |
| 93.                                 | Hept-2-ene, 2,4,4,6-tetramethyl                            | -4.3 | 0.927 |
| 94.                                 | Sulfurous acid                                             | -3.3 | 1.244 |
| 95.                                 | Phthalic acid                                              | -4.8 | 1.595 |
| 96.                                 | 1,2-Propanediol                                            | -3.6 | 1.388 |

## References

1. Rodeiro, I.; Olguín, S.; Santes, R.; Herrera, J.A.; Pérez, C.L.; Mangas, R.; Hernández, Y.; Fernández, G.; Hernández, I.; Hernández-Ojeda, S.; Camacho-Carranza, R.; Valencia-Olvera, A.; Espinosa-Aguirre, J.J. Gas chromatography-mass spectrometry analysis of *Ulva fasciata* (Green Seaweed) extract and evaluation of its cytoprotective and antigenotoxic effects. *Evid. Based. Complement. Alternat. Med.* **2015**, *2015*, 520598.
2. Hassan, S.; Shobier, A. GC/MS identification and applications of bioactive seaweed extracts from Mediterranean coast of Egypt. *Egypt. J. Aquat. Biol. Fish.* **2018**, *22*, 1-21.
3. Deepak, P.; Sowmiya, R.; Kamaraj, C.; Josebin, M.; Aiswarya, D.; Govindasamy, B.; Amutha, V.; Perumal, P. GC-MS profiling, chemical characterization, antioxidant,  $\alpha$ -amylase and  $\alpha$ -glucosidase inhibition of selected seaweeds from southeast coast of India, in vitro approach. *J. drug deliv. ther.* **2018**, *8*, 29-40.
4. Kumari, P.; Reddy, C.R.; Jha, B. Comparative evaluation and selection of a method for lipid and fatty acid extraction from macroalgae. *Anal. Biochem.* **2011**, *415*, 134-44.
5. Ragunath, C.; Kumar, Y.A.S.; Kanivalan, I.; Radhakrishnan, S. Phytochemical screening and GC-MS analysis of bioactive constituents in the methanolic extract of

*caulerpa racemosa* (Forssk.) j. agardh and *padina boergesenii* allender & kraft. *Curr. Appl. Sci. Technol.* **2020**, *20*, 380-393.

6. Arulkumar A, Rosemary T, Paramasivam S, Rajendran R. Phytochemical composition, in vitro antioxidant, antibacterial potential and GC-MS analysis of red seaweeds (*Gracilaria corticata* and *Gracilaria edulis*) from Palk Bay, India. *Biocatal. Agric. Biotechnol.* **2018**, *15*, 63-71.
